# Supplementary material for: Übersetzung und sprachliche Validierung des modifizierten-Short QUestionnaire to Assess Health-enhancing physical activity (mSQUASH) ins Deutsche für Patienten mit axialer Spondyloarthritis (axSpA)
Source: Springer Nature journal article supplement (doi:10.1007/s00393-024-01508-9), 2024-05-08
Supplement: MOESM1 [file 27068962]

# mSQUASH

## Fragebogen – Körperliche Aktivität

Datum:  
Name/Studiennummer:  
Land:

### ANLEITUNG – Bitte lesen Sie die folgenden Hinweise sorgfältig, bevor Sie mit der Beantwortung der Fragen beginnen

Denken Sie an eine normale Woche im letzten Monat. Bitte geben Sie an,

- an wie vielen Tagen pro Woche Sie die untenstehenden Aktivitäten ausführen
- wie viel Zeit Sie jeweils mit den Aktivitäten verbracht haben und
- wie körperlich anstrengend jede dieser Aktivitäten für Sie war.

#### BEISPIEL

##### Weg zur Arbeit oder Schule (Hin- und Rückfahrt)

(Bezahlte/unbezahlte Arbeit oder Schule/ Studium)

1. Zu Fuß zur/von der Arbeit oder zur Schule/zum Studium

Nicht zutreffend

Anzahl Tage pro Woche

5. Tage

Durchschnittliche Dauer pro Tag

0 Stunden 30 Minuten

Anstrengungsgrad

- Langsam/leicht  
 Mäßig  
 Schnell/schwer

#### Erläuterung des Anstrengungsgrades

Langsam/leicht

Ruhiger Herzschlag und ruhige Atmung

Mäßig

Erhöhter Herzschlag und beschleunigte Atmung

Schnell/Schwer

Erhöhter Herzschlag, beschleunigte Atmung und Schwitzen

### START FRAGENBOGEN

|                                                                                                                                                                                                                                                |                       |                       |                                 |                                                                                                             |
|------------------------------------------------------------------------------------------------------------------------------------------------------------------------------------------------------------------------------------------------|-----------------------|-----------------------|---------------------------------|-------------------------------------------------------------------------------------------------------------|
| <b>Weg zur Arbeit oder Schule (Hin- und Rückfahrt)</b><br>(Bezahlte/unbezahlte Arbeit oder Schule/ Studium)<br>1. Zu Fuß zur/von der Arbeit oder zur Schule/zum Studium<br>2. Radfahren zur/von der Arbeit oder zur Schule/zum Studium         | Nicht zutreffend      | Anzahl Tage pro Woche | Durchschnittliche Dauer pro Tag | Anstrengungsgrad                                                                                            |
|                                                                                                                                                                                                                                                | <input type="radio"/> | ___ Tage              | ___ Stunden ___ Minuten         | <input type="radio"/> Langsam/leicht<br><input type="radio"/> Mäßig<br><input type="radio"/> Schnell/schwer |
| <b>Andere Ziele (Hin- und Rückfahrt)</b><br>(Z.B. jemanden besuchen, zum Sportverein oder Supermarkt)<br>3. Zu Fuß zu/von einem anderen Ziel<br>4. Radfahren zu/von einem anderen Ziel                                                         | Nicht zutreffend      | Anzahl Tage pro Woche | Durchschnittliche Dauer pro Tag | Anstrengungsgrad                                                                                            |
|                                                                                                                                                                                                                                                | <input type="radio"/> | ___ Tage              | ___ Stunden ___ Minuten         | <input type="radio"/> Langsam/leicht<br><input type="radio"/> Mäßig<br><input type="radio"/> Schnell/schwer |
| <b>Arbeit (bezahlt/unbezahlt) oder Schule/Studium</b><br>5. Wie viele Stunden pro Woche arbeiten Sie oder gehen Sie zur Schule/zum Studium?<br>6. Wie viele von diesen Stunden sind anstrengende Arbeit? (Z.B. regelmäßig schwere Dinge heben) |                       |                       | Nicht zutreffend                | Anzahl Stunden pro Woche                                                                                    |
|                                                                                                                                                                                                                                                |                       |                       | <input type="radio"/>           | ___ Stunden                                                                                                 |
|                                                                                                                                                                                                                                                |                       |                       | <input type="radio"/>           | ___ Stunden                                                                                                 |

**ANLEITUNG**Denken Sie an eine normale Woche im letzten Monat.**Erläuterung des Anstrengungsgrades**

Langsam/leicht

Ruhiger Herzschlag und ruhige Atmung

Mäßig

Erhöhter Herzschlag und beschleunigte Atmung

Schnell/Schwer

Erhöhter Herzschlag, beschleunigte Atmung und Schwitzen

| <b>Tätigkeiten im Haushalt</b>                                                                                                        | <b>Nicht zutreffend</b> | <b>Anzahl Tage pro Woche</b> | <b>Durchschnittliche Dauer pro Tag</b> | <b>Anstrengungsgrad</b>                                                                                     |
|---------------------------------------------------------------------------------------------------------------------------------------|-------------------------|------------------------------|----------------------------------------|-------------------------------------------------------------------------------------------------------------|
| 7. Leichte und mäßig anstrengende Hausarbeit<br>(Z.B. Kochen, Geschirrspülen, Aufräumen)                                              | <input type="radio"/>   | ___ Tage                     | __ Stunden __ Minuten                  | <input type="radio"/> Langsam/leicht<br><input type="radio"/> Mäßig<br><input type="radio"/> Schnell/schwer |
| 8. Schwere, anstrengende Hausarbeit<br>(Z.B. Bettwäsche wechseln, kleine Kinder heben, Badezimmer putzen, schwere Lebensmittel heben) | <input type="radio"/>   | ___ Tage                     | __ Stunden __ Minuten                  | <input type="radio"/> Langsam/leicht<br><input type="radio"/> Mäßig<br><input type="radio"/> Schnell/schwer |
| <b>Freizeitaktivitäten</b>                                                                                                            | <b>Nicht zutreffend</b> | <b>Anzahl Tage pro Woche</b> | <b>Durchschnittliche Dauer pro Tag</b> | <b>Anstrengungsgrad</b>                                                                                     |
| 9. Spaziergehen                                                                                                                       | <input type="radio"/>   | ___ Tage                     | __ Stunden __ Minuten                  | <input type="radio"/> Langsam/leicht<br><input type="radio"/> Mäßig<br><input type="radio"/> Schnell/schwer |
| 10. Fahrradfahren                                                                                                                     | <input type="radio"/>   | ___ Tage                     | __ Stunden __ Minuten                  | <input type="radio"/> Langsam/leicht<br><input type="radio"/> Mäßig<br><input type="radio"/> Schnell/schwer |
| 11. Gartenarbeit                                                                                                                      | <input type="radio"/>   | ___ Tage                     | __ Stunden __ Minuten                  | <input type="radio"/> Langsam/leicht<br><input type="radio"/> Mäßig<br><input type="radio"/> Schnell/schwer |
| 12. Heimwerken                                                                                                                        | <input type="radio"/>   | ___ Tage                     | __ Stunden __ Minuten                  | <input type="radio"/> Langsam/leicht<br><input type="radio"/> Mäßig<br><input type="radio"/> Schnell/schwer |
| 13. Einkaufen                                                                                                                         | <input type="radio"/>   | ___ Tage                     | __ Stunden __ Minuten                  | <input type="radio"/> Langsam/leicht<br><input type="radio"/> Mäßig<br><input type="radio"/> Schnell/schwer |
| <b>Sport und Bewegung</b><br>(Z.B. ins Fitnessstudio gehen, physiotherapeutische Übungen, Laufen, Tennis, Fußball, Schwimmen, Tanzen) | <b>Nicht zutreffend</b> | <b>Anzahl Tage pro Woche</b> | <b>Durchschnittliche Dauer pro Tag</b> | <b>Anstrengungsgrad</b>                                                                                     |
| 14. _____                                                                                                                             | <input type="radio"/>   | ___ Tage                     | __ Stunden __ Minuten                  | <input type="radio"/> Langsam/leicht<br><input type="radio"/> Mäßig<br><input type="radio"/> Schnell/schwer |
| 15. _____                                                                                                                             |                         | ___ Tage                     | __ Stunden __ Minuten                  | <input type="radio"/> Langsam/leicht<br><input type="radio"/> Mäßig<br><input type="radio"/> Schnell/schwer |
| 16. _____                                                                                                                             |                         | ___ Tage                     | __ Stunden __ Minuten                  | <input type="radio"/> Langsam/leicht<br><input type="radio"/> Mäßig<br><input type="radio"/> Schnell/schwer |
| 17. _____                                                                                                                             |                         | ___ Tage                     | __ Stunden __ Minuten                  | <input type="radio"/> Langsam/leicht<br><input type="radio"/> Mäßig<br><input type="radio"/> Schnell/schwer |

**Ende des Fragebogens.****Würden Sie bitte einmal überprüfen, ob Sie alle Fragen beantwortet haben?****Herzlichen Dank für Ihre Mitarbeit!**
